# Supplementary material
Source: PubMed Central journal article supplement (PMC3568774)
Supplement: NIHMS365476-supplement-1_si_001.pdf [file NIHMS365476-supplement-1_si_001.pdf]

## Supporting Information for

## The Effects of Computational Modeling Errors on the Estimation of Statistical Mechanical Variables

John C. Faver, Wei Yang, Kenneth M. Merz, Jr.

## 1) Derivatives of A

$$A = -\frac{1}{\beta} \ln(\sum e^{-\beta E_i}) = -\frac{1}{\beta} \ln Q$$

1<sup>st</sup> order: 
$$\frac{\partial A}{\partial E_i} = \frac{e^{-\beta E_i}}{Q} = P_i$$

2<sup>nd</sup> order:

$$\begin{aligned} \frac{\partial^2 A}{\partial E_i^2} &= \frac{Q(-\beta)e^{-\beta E_i} - e^{-\beta E_i}(-\beta)e^{-\beta E_i}}{Q^2} = \\ \frac{\partial^2 A}{\partial E_i^2} &= \beta \left( \frac{e^{-2\beta E_i}}{Q^2} - \frac{e^{-\beta E_i}}{Q} \right) = \\ \frac{\partial^2 A}{\partial E_i^2} &= \beta(P_i^2 - P_i) = \frac{\partial P_i}{\partial E_i} \end{aligned}$$

$$\begin{aligned} \frac{\partial^2 A}{\partial E_i \partial E_j} &= \frac{Q(0) - e^{-\beta E_i}(-\beta)e^{-\beta E_j}}{Q^2} = \\ \frac{\partial^2 A}{\partial E_i \partial E_j} &= \beta(P_i P_j) = \frac{\partial P_i}{\partial E_j} \end{aligned}$$

3<sup>rd</sup> order:

$$\begin{aligned} \frac{\partial^3 A}{\partial E_i^3} &= \beta(2P_i\beta(P_i^2 - P_i) - \beta(P_i^2 - P_i)) = \\ \frac{\partial^3 A}{\partial E_i^3} &= \beta^2(2P_i^3 - 3P_i^2 + P_i) \end{aligned}$$

$$\frac{\partial^3 A}{\partial E_i \partial E_j \partial E_k} = \frac{\partial}{\partial E_k} [\beta P_i P_j] =$$

$$\frac{\partial^3 A}{\partial E_i \partial E_j \partial E_k} = 2\beta^2 P_i P_k P_j$$

$$\frac{\partial^3 A}{\partial E_i^2 \partial E_j} = \frac{\partial}{\partial E_j} \beta(P_i^2 - P_i) =$$

$$\frac{\partial^3 A}{\partial E_i^2 \partial E_j} = \beta[2P_i\beta P_i P_j - \beta P_i P_j] =$$

$$\frac{\partial^3 A}{\partial E_i^2 \partial E_j} = \beta^2 P_i P_j [2P_i - 1]$$

4<sup>th</sup> order:

$$\frac{\partial^4 A}{\partial E_i^4} = \beta^3 (6P_i^4 - 12P_i^3 + 7P_i^2 - P_i)$$

$$\frac{\partial^4 A}{\partial E_i^2 \partial E_j^2} = \frac{\partial}{\partial E_j} \beta^2 P_i P_j [2P_i - 1] =$$

$$\frac{\partial^4 A}{\partial E_i^2 \partial E_j^2} = \beta^2 [\beta P_i P_j P_j [2P_i - 1] + P_i \beta (P_j^2 - P_j) [2P_i - 1] + P_i P_j 2\beta P_i P_j] =$$

$$\frac{\partial^4 A}{\partial E_i^2 \partial E_j^2} = \beta^3 P_i P_j [6P_i P_j - 2P_i - 2P_j + 1]$$

$$\frac{\partial^4 A}{\partial E_i^3 \partial E_j} = \frac{\partial}{\partial E_j} \beta^2 (2P_i^3 - 3P_i^2 + P_i) =$$

$$\frac{\partial^4 A}{\partial E_i^3 \partial E_j} = \beta^2 [6P_i^2 \beta P_i P_j - 6P_i \beta P_i P_j + \beta P_i P_j] =$$

$$\frac{\partial^4 A}{\partial E_i^3 \partial E_j} = \beta^3 P_i P_j [6P_i^2 - 6P_i + 1]$$

$$\frac{\partial^4 A}{\partial E_i^2 \partial E_j \partial E_k} = \frac{\partial}{\partial E_k} \beta^2 P_i P_j [2P_i - 1] =$$

$$\frac{\partial^4 A}{\partial E_i^2 \partial E_j \partial E_k} = \beta^2 [\beta P_i P_k P_j (2P_i - 1) + P_i \beta P_j P_k (2P_i - 1) + P_i P_j 2\beta P_i P_k] =$$

$$\frac{\partial^4 A}{\partial E_i^2 \partial E_j \partial E_k} = \beta^3 P_i P_k P_j [(6P_i - 2)]$$

$$\frac{\partial^4 A}{\partial E_i \partial E_j \partial E_k \partial E_l} = \frac{\partial}{\partial E_l} 2\beta^2 P_i P_k P_j =$$

$$\frac{\partial^4 A}{\partial E_i \partial E_j \partial E_k \partial E_l} = 2\beta^2 [\beta P_i P_l P_k P_j + P_i \beta P_k P_l P_j + P_i P_k \beta P_j P_l] =$$

$$\frac{\partial^4 A}{\partial E_i \partial E_j \partial E_k \partial E_l} = 6\beta^3 P_i P_l P_k P_j$$

2) First-order error propagation in A

$$A = -\frac{1}{\beta} \ln\left(\sum e^{-\beta E_i}\right)$$

$$\frac{\partial A}{\partial E_i} = \frac{e^{-\beta E_i}}{Q} = P_i$$

$$\delta A_1 = \sum_i P_i \delta E_i^{Sys} \pm \sqrt{\sum_i (P_i \delta E_i^{Rand})^2}$$

3) First-order error propagation in E

$$E = \frac{\sum_i E_i \exp(-\beta E_i)}{Q} = \frac{\sum_i E_i \exp(-\beta E_i)}{\sum_i \exp(-\beta E_i)}$$

$$\frac{\partial E}{\partial E_j} = \frac{Q[\exp(-\beta E_j) + (-\beta) \exp(-\beta E_j) E_j] - (-\beta) \exp(-\beta E_j) \sum_i E_i \exp(-\beta E_i)}{Q^2}$$

$$\frac{\partial E}{\partial E_j} = \frac{\exp(-\beta E_j)}{Q} - \frac{(\beta) \exp(-\beta E_j) E_j}{Q} + (\beta) \frac{\exp(-\beta E_j)}{Q} \frac{\sum_i E_i \exp(-\beta E_i)}{Q}$$

$$\frac{\partial E}{\partial E_j} = P_j - \beta P_j E_j + \beta P_j E$$

$$\frac{\partial E}{\partial E_j} = P_j (1 - \beta E_j + \beta E)$$

$$\delta E = \sum_i |P_i (1 - \beta E_i + \beta E)| \delta E_i^{Sys} \pm \sqrt{\sum_i (P_i (1 - \beta E_i + \beta E) \delta E_i^{Rand})^2}$$

4) First-order error propagation in S

$$S = -k \sum_i P_i \ln P_i$$

$$S = -k \sum_i \frac{e^{-\beta E_i}}{\sum_j e^{-\beta E_j}} \ln \left( \frac{e^{-\beta E_i}}{\sum_j e^{-\beta E_j}} \right) = S_i + S_a$$

Since each term in the outer sum in  $S$  depends on every state (via the partition functions in the denominators), we break  $S$  into two parts:  $S_i$  for the outer sum term for state  $i$ , and  $S_a$  for all the remaining terms:

$$S_i = -k \frac{e^{-\beta E_i}}{\sum_j e^{-\beta E_j}} \ln \left( \frac{e^{-\beta E_i}}{\sum_j e^{-\beta E_j}} \right) \quad S_a = -k \sum_{a \neq i} \frac{e^{-\beta E_a}}{\sum_j e^{-\beta E_j}} \ln \left( \frac{e^{-\beta E_a}}{\sum_j e^{-\beta E_j}} \right)$$

Now,

$$\frac{\partial S}{\partial E_i} = \frac{\partial S_i}{\partial E_i} + \frac{\partial S_a}{\partial E_i}$$

$$\frac{\partial S_i}{\partial E_i} = -k \left[ \frac{\left( (-\beta) e^{-\beta E_i} \sum_j e^{-\beta E_j} - (-\beta) e^{-2\beta E_i} \right)}{\left( \sum_j e^{-\beta E_j} \right)^2} \ln \left( \frac{e^{-\beta E_i}}{\sum_j e^{-\beta E_j}} \right) + \frac{e^{-\beta E_i}}{\sum_j e^{-\beta E_j}} \left( (-\beta) - \frac{(-\beta) e^{-\beta E_i}}{\sum_j e^{-\beta E_j}} \right) \right]$$

$$\frac{\partial S_i}{\partial E_i} = -k(-\beta) \left[ \frac{\left( e^{-\beta E_i} \sum_j e^{-\beta E_j} - e^{-2\beta E_i} \right)}{\left( \sum_j e^{-\beta E_j} \right)^2} \ln \left( \frac{e^{-\beta E_i}}{\sum_j e^{-\beta E_j}} \right) + \frac{e^{-\beta E_i}}{\sum_j e^{-\beta E_j}} \left( 1 - \frac{e^{-\beta E_i}}{\sum_j e^{-\beta E_j}} \right) \right]$$

$$\frac{\partial S_i}{\partial E_i} = \frac{1}{T} \left[ (P_i - P_i^2) \ln(P_i) + (P_i - P_i^2) \right]$$

$$\frac{\partial S_i}{\partial E_i} = \frac{(P_i - P_i^2)}{T} [\ln(P_i) + 1]$$

$$S_a = -k \sum_{a \neq i} \frac{e^{-\beta E_a}}{\sum_j e^{-\beta E_j}} \ln \left( \frac{e^{-\beta E_a}}{\sum_j e^{-\beta E_j}} \right)$$

$$S_a = -k \sum_{a \neq i} e^{-\beta E_a} \left( \sum_j e^{-\beta E_j} \right)^{-1} \ln(e^{-\beta E_a}) - e^{-\beta E_a} \left( \sum_j e^{-\beta E_j} \right)^{-1} \ln \left( \sum_j e^{-\beta E_j} \right)$$

$$\frac{\partial S_a}{\partial E_i} = -k \sum_{a \neq i} \left[ \begin{aligned} & e^{-\beta E_a} \ln(e^{-\beta E_a}) (-1) \left( \sum_j e^{-\beta E_j} \right)^{-2} (-\beta) e^{-\beta E_i} + \\ & - e^{-\beta E_a} (-1) \left( \sum_j e^{-\beta E_j} \right)^{-2} (-\beta) e^{-\beta E_i} \ln \left( \sum_j e^{-\beta E_j} \right) + \\ & - e^{-\beta E_a} \left( \sum_j e^{-\beta E_j} \right)^{-1} \frac{(-\beta) e^{-\beta E_i}}{\sum_j e^{-\beta E_j}} \end{aligned} \right]$$

$$\frac{\partial S_a}{\partial E_i} = -\frac{1}{T} \sum_{a \neq i} \left[ \frac{e^{-\beta E_a} \ln(e^{-\beta E_a}) e^{-\beta E_i}}{\left( \sum_j e^{-\beta E_j} \right)^2} - \frac{e^{-\beta E_a} e^{-\beta E_i} \ln \left( \sum_j e^{-\beta E_j} \right)}{\left( \sum_j e^{-\beta E_j} \right)^2} + \frac{e^{-\beta E_a} e^{-\beta E_i}}{\left( \sum_j e^{-\beta E_j} \right)^2} \right]$$

$$\frac{\partial S_a}{\partial E_i} = -\frac{1}{T} \sum_{a \neq i} \left[ P_i P_a \ln(e^{-\beta E_a}) - P_i P_a \ln \left( \sum_j e^{-\beta E_j} \right) + P_i P_a \right]$$

$$\frac{\partial S_a}{\partial E_i} = -\frac{1}{T} \sum_{a \neq i} \left[ P_i P_a \ln \left( \frac{e^{-\beta E_a}}{\sum_j e^{-\beta E_j}} \right) + P_i P_a \right]$$

$$\frac{\partial S_a}{\partial E_i} = -\frac{1}{T} \sum_{a \neq i} P_i P_a [\ln(P_a) + 1]$$

$$\frac{\partial S}{\partial E_i} = \frac{\partial S_i}{\partial E_i} + \frac{\partial S_a}{\partial E_i} = \frac{(P_i - P_i^2)}{T} [\ln(P_i) + 1] - \frac{1}{T} \sum_{a \neq i} P_i P_a [\ln(P_a) + 1]$$

$$\frac{\partial S}{\partial E_i} = \frac{(P_i - P_i^2)}{T} [\ln(P_i) + 1] - \frac{P_i}{T} \sum_{a \neq i} P_a \ln(P_a) - \frac{P_i}{T} \sum_{a \neq i} P_a$$

Now use the fact that  $P_i = 1 - \sum_{a \neq i} P_a$

$$\frac{\partial S}{\partial E_i} = \frac{(P_i - P_i^2)}{T} [\ln(P_i) + 1] - \frac{P_i}{T} \sum_{a \neq i} P_a \ln(P_a) - \frac{P_i}{T} (1 - P_i)$$

$$\frac{\partial S}{\partial E_i} = \frac{P_i}{T} \left[ (1 - P_i) \ln(P_i) + (1 - P_i) - \sum_{a \neq i} P_a \ln(P_a) - (1 - P_i) \right]$$

$$\frac{\partial S}{\partial E_i} = \frac{P_i}{T} \left[ (1 - P_i) \ln(P_i) - \sum_{a \neq i} P_a \ln(P_a) \right]$$

$$\frac{\partial S}{\partial E_i} = \frac{P_i}{T} \left[ \ln(P_i) - \sum_j P_j \ln(P_j) \right]$$

$$\frac{\partial S}{\partial E_i} = \frac{P_i}{T} \left[ \ln(P_i) + \frac{S}{k} \right]$$

$$\frac{\partial S}{\partial E_i} = \beta P_i [k \ln(P_i) + S]$$

$$\delta S = \sum_i |\beta P_i [k \ln(P_i) + S]| \delta E_i^{\text{Sys}} \pm \sqrt{\sum_i ((\beta P_i [k \ln(P_i) + S]) \delta E_i^{\text{Rand}})^2}$$

5) Second-order error propagation in A. The following formulas were adapted from Ref. 9.

$$Err_{\text{Sys}} \approx \sum_i P_i \delta E_i^{\text{Sys}} + \frac{1}{2} \sum_i \frac{\partial^2 A}{\partial E_i^2} (\delta E_i^{\text{Rand}})^2$$

$$(Err_{\text{Rand}})^2 \approx \sum_i \left( \frac{\partial A}{\partial E_i} \right)^2 (\delta E_i^{\text{Rand}})^2 - \frac{1}{4} \left[ \sum_i \frac{\partial^2 A}{\partial E_i^2} (\delta E_i^{\text{Rand}})^2 \right]^2$$

Replace the partial derivatives with the appropriate expressions from S1-S2:

$$\delta A_2 = \left[ \sum_i P_i \delta E_i^{Sys} + \frac{1}{2} \sum_i \beta (P_i^2 - P_i) (\delta E_i^{Rand})^2 \right] \pm \left[ \sum_i (P_i \delta E_i^{Rand})^2 - \frac{1}{4} \left( \sum_i \beta (P_i^2 - P_i) (\delta E_i^{Rand})^2 \right)^2 \right]^{\frac{1}{2}}$$

6) Fourth-order error propagation in A. The following formulas were adapted from Ref. 9.

$$\begin{aligned} Err_{Sys} &\approx \sum_i P_i \delta E_i^{Sys} + \frac{1}{2} \sum_i \frac{\partial^2 A}{\partial E_i^2} (\delta E_i^{Rand})^2 + \frac{1}{4} \sum_i \sum_{j>i} \frac{\partial^4 A}{\partial E_i^2 \partial E_j^2} (\delta E_i^{Rand})^2 (\delta E_j^{Rand})^2 \\ (Err_{Rand})^2 &\approx \sum_i \left( \frac{\partial A}{\partial E_i} \right)^2 (\delta E_i^{Rand})^2 + \\ &-\frac{1}{4} \left[ \sum_i \frac{\partial^2 A}{\partial E_i^2} (\delta E_i^{Rand})^2 \right]^2 + \\ &\sum_i \sum_{j \neq i} \frac{\partial A}{\partial E_i} \frac{\partial^3 A}{\partial E_i \partial E_j^2} (\delta E_i^{Rand})^2 (\delta E_j^{Rand})^2 + \\ &-\frac{1}{4} \sum_i \sum_{j>i} \frac{\partial^4 A}{\partial E_i^2 \partial E_j^2} (\delta E_i^{Rand})^2 (\delta E_j^{Rand})^2 \left[ \frac{\partial^2 A}{\partial E_i^2} (\delta E_i^{Rand})^2 + \frac{\partial^2 A}{\partial E_j^2} (\delta E_j^{Rand})^2 + \frac{1}{4} \frac{\partial^4 A}{\partial E_i^2 \partial E_j^2} (\delta E_i^{Rand})^2 (\delta E_j^{Rand})^2 \right] \end{aligned}$$

Replace the partial derivatives with the appropriate expressions from S1-S2:

$$\begin{aligned} \delta A_4 &= \left[ \sum_i P_i \delta E_i^{Sys} + \frac{1}{2} \sum_i \beta (P_i^2 - P_i) (\delta E_i^{Rand})^2 + \frac{1}{4} \sum_i \sum_{j>i} \beta^3 P_i P_j [6P_i P_j - 2P_i - 2P_j + 1] (\delta E_i^{Rand})^2 (\delta E_j^{Rand})^2 \right] \\ &\pm \left[ \sum_i (P_i \delta E_i^{Rand})^2 - \frac{1}{4} \left( \sum_i \beta (P_i^2 - P_i) (\delta E_i^{Rand})^2 \right)^2 + \sum_i \sum_{j \neq i} P_i \beta^2 P_i P_j [2P_j - 1] (\delta E_i^{Rand})^2 (\delta E_j^{Rand})^2 + \right. \\ &\left. - \frac{1}{4} \sum_i \sum_{j>i} \beta^3 P_i P_j [6P_i P_j - 2P_i - 2P_j + 1] (\delta E_i^{Rand})^2 (\delta E_j^{Rand})^2 * \right. \\ &\left. \left( \beta (P_i^2 - P_i) (\delta E_i^{Rand})^2 + \beta (P_j^2 - P_j) (\delta E_j^{Rand})^2 + \frac{1}{4} \beta^3 P_i P_j [6P_i P_j - 2P_i - 2P_j + 1] (\delta E_i^{Rand})^2 (\delta E_j^{Rand})^2 \right) \right]^{\frac{1}{2}} \end{aligned}$$
